# Supplementary material for: Retinoid-Binding Proteins: Similar Protein Architectures Bind Similar Ligands via Completely Different Ways
Source: PubMed Central journal article supplement (PMC3344936; doi:10.1371/journal.pone.0036772), 2012-05-04
Supplement: pone.0036772.s002.pdf [file pone.0036772.s002.pdf]

**Table S1. The binding energy between retinoids binding proteins and their ligands**

| Protein                                           | RBP(1brp) | CRBP(1crb) | ERABP(1epb) | CRABP(1cbs) |
|---------------------------------------------------|-----------|------------|-------------|-------------|
| Top<br>ten<br>Binding<br>Energy<br><br>(kcal/mol) | -87.21842 | -81.88952  | -109.37775  | -229.07327  |
|                                                   | -87.21996 | -81.88583  | -106.39604  | -229.07442  |
|                                                   | -87.22162 | -81.10282  | -118.44061  | -233.66422  |
|                                                   | -87.22178 | -81.10774  | -105.52261  | -233.81225  |
|                                                   | -87.22025 | -81.10824  | -94.60466   | -229.19979  |
|                                                   | -87.22163 | -81.11019  | -108.46828  | -221.4997   |
|                                                   | -87.22008 | -81.10822  | -105.38868  | -221.49902  |
|                                                   | -82.28446 | -80.90537  | -106.39851  | -221.49894  |
|                                                   | -87.97112 | -81.10728  | -105.52446  | -221.49862  |
|                                                   | -87.53759 | -81.10772  | -94.60132   | -222.01486  |
| Average                                           | -86.8337  | -81.2433   | -105.472    | -226.284    |
