# Supplementary material for: Retinoid-Binding Proteins: Similar Protein Architectures Bind Similar Ligands via Completely Different Ways
Source: PubMed Central journal article supplement (PMC3344936; doi:10.1371/journal.pone.0036772), 2012-05-04
Supplement: pone.0036772.s003.pdf [file pone.0036772.s003.pdf]

**Table S2. The sequence identity of four retinoids binding proteins**

| Protein name      | RBP    | ERABP  | CRBP   | CRABP  |
|-------------------|--------|--------|--------|--------|
| PDB ID            | 1brp   | 1epb   | 1crb   | 1cbs   |
| Amino acid number | 182AA  | 164 AA | 134 AA | 137 AA |
| RBP               | -      |        |        |        |
| ERABP             | 21.9%  | -      |        |        |
| CRBP              | 9.34%  | 12.8%  | -      |        |
| CRABP             | 13.74% | 15.85% | 41.84% | -      |
