# Supplementary material for: Retinoid-Binding Proteins: Similar Protein Architectures Bind Similar Ligands via Completely Different Ways
Source: PubMed Central journal article supplement (PMC3344936; doi:10.1371/journal.pone.0036772), 2012-05-04
Supplement: pone.0036772.s004.pdf [file pone.0036772.s004.pdf]

**Table S3. The value of RMSD of CE structure alignment**

| Protein name      | RBP   | ERABP  | CRBP   | CRABP  |
|-------------------|-------|--------|--------|--------|
| PDB ID            | 1brp  | 1epb   | 1crb   | 1cbs   |
| Amino acid number | 182AA | 164 AA | 134 AA | 137 AA |
| RBP               | -     |        |        |        |
| ERABP             | 2.3   | -      |        |        |
| CRBP              | 4.4   | 3.2    | -      |        |
| CRABP             | 4.2   | 3.2    | 1.5    | -      |
